# Supplementary figures and images for: Reciprocal regulation of glycine-rich RNA-binding proteins via an interlocked feedback loop coupling alternative splicing to nonsense-mediated decay in Arabidopsis
Source: PubMed Central journal article supplement — Nucleic Acids Res. 2008 Nov 4;36(22):6977–87. doi: 10.1093/nar/gkn847 (PMC2602770; doi:10.1093/nar/gkn847), 2008-11-04

0 1 2 5 days at 4 °C

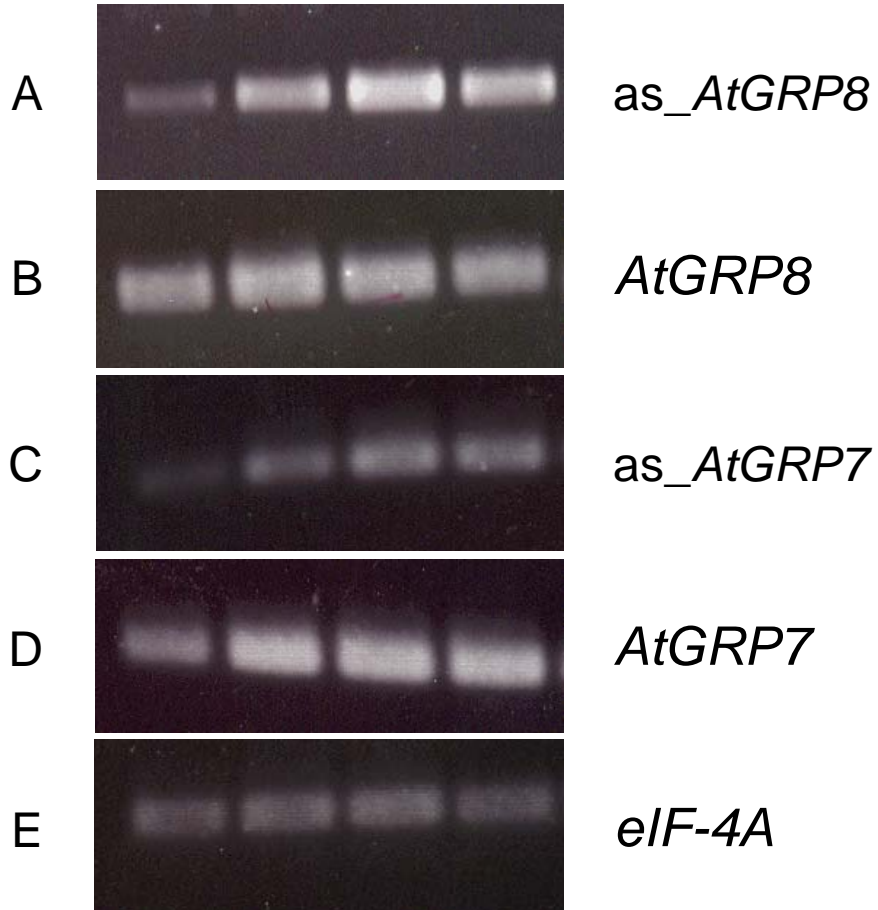

Supplement: gkn847_1.pdf [file gkn847_1.pdf]
